# Supplementary material for: Tumor Budding-Derived CCL5 Recruits Fibroblasts to Promote Colorectal Cancer Progression Through CCR5-SLC25A24 Signaling
Source: Research Square preprint supplement (doi:10.21203/rs.3.rs-961545/v1), 2021-10-19
Supplement: Supplementary file 1 [file 2fcda8f86b31a0febd9a162c.xlsx]

## Sheet: Sheet1
Additional file 6: Table S2: List of RNA interference oligo sequences.
siRNAs	Sense 5’ to 3’	Anti-sense 5’ to 3’
CCL5-1	CAAGCUUUGUCACCCGAAATT	UUUCGGGUGACAAAGCUUGTT
CCL5-2	GGGUUCGGGAGUACAUCAATT	UUGAUGUACUCCCGAACCCTT
CCL5-3	CUUACACAAAUUUGCCUGUTT	ACAGGCAAAUUUGUGUAAGTT
CCR1	UCUGAAACUGAACCUCUUUTT	AAAGAGGUUCAGUUUCAGAGC
CCR3	GAAUUAUGACCAACAUCUATT	UAGAUGUUGGUCAUAAUUCTT
CCR4	ACCUUUGAAAACUGAUUGGTT	CCAAUCAGUUUUCAAAGGUGC
CCR5	GUCCAAUCUAUGACAUCAATT	UUGAUGUCAUAGAUUGGACTT
CD44	GUCUUCAGGAUUCGUUCUUTT	AAGAACGAAUCCUGAAGACAU
GPR75	GCAACUUCAUUGUCUUCUUTT	AAGAAGACAAUGAAGUUGCTT
SLC25A24-1	GGUGCUGUCUCUCGAACAATT	UUGUUCGAGAGACAGCACCTT
SLC25A24-2	GGGCAUAUGAACAGUACAATT	UUGUACUGUUCAUAUGCCCTT
SLC25A24-3	GCAUCAGUUAUGUGGUUUATT	UAAACCACAUAACUGAUGCTT
