# Supplementary material for: Tumor Budding-Derived CCL5 Recruits Fibroblasts to Promote Colorectal Cancer Progression Through CCR5-SLC25A24 Signaling
Source: Research Square preprint supplement (doi:10.21203/rs.3.rs-961545/v1), 2021-10-19
Supplement: Supplementary file 2 [file 6a3e65ade81a9d97f0a01b31.xlsx]

## Sheet: Sheet1
Additional file 5: Table S1: List of antibodies and reagents used in the study.
Antibody	Catalog Number	Commercial providers	Application
α-SMA	ab7817	Abcam	WB/IHC/IF
CD90	66766-1-Ig	Proteintech	WB/IHC
FAP	ab53066	Abcam	IHC
GAPDH	60004-1-Ig	Proteintech	WB
E-cadherin	20874-1-AP	Proteintech	IF
Vimentin	10366-1-AP	Proteintech	IF
CCL5	AF5151	Affinity	IHC
CCR1	bs-1169R	Bioss	WB
CCR3	ab32512	Abcam	WB
CCR4	YT5290	Immunoway	WB
CCR5	ab7346	Abcam	WB
CD44	ab189524	Abcam	WB
GPR75	bs-16263R	Bioss	WB
SLC25A24	Ab221120	Abcam	WB
SLC25A24	PA5-66609	ThermoFisher	IF
PI3K	#4257	Cell Signaling Technology	WB
p-PI3K	#4228	Cell Signaling Technology	WB
Akt	#4691	Cell Signaling Technology	WB
p-Akt	#4060	Cell Signaling Technology	WB
mTOR	#2983	Cell Signaling Technology	WB
p-mTOR	#5536	Cell Signaling Technology	WB
COL1	14695-1-AP	Proteintech	WB
COL3	22734-1-AP	Proteintech	WB
CD31	11265-1-AP	Proteintech	WB
FLI1	11347-1-AP	Proteintech	WB
VE-cadherin	Ab33168	Abcam	WB
VEGFA	66828-1-Ig	Proteintech	WB
